# Supplementary material for: Multidimensionally ordered mesoporous intermetallics: Frontier nanoarchitectonics for advanced catalysis
Source: Royal Society of Chemistry journal article supplement (doi:10.1039/d4cs00484a), 2024-01-01
Supplement: d4cs00484a1.pdf [file d4cs00484a1.pdf]

## Supporting Information for

# Multidimensionally ordered mesoporous intermetallics: Frontier nanoarchitectonics for advanced catalysis

Hao Lv,<sup>1,2</sup> and Ben Liu<sup>1,\*</sup>

<sup>1</sup>Key Laboratory of Green Chemistry and Technology of Ministry of Education, College of Chemistry, Sichuan University, Chengdu 610064, China. \*Email: ben.liu@scu.edu.cn

<sup>2</sup>School of Chemistry and Chemical Engineering, Shanghai Jiao Tong University, Shanghai 200240, China

**Table S1.** Comparison of the three synthetic strategies for preparing MOMIs.

| Synthetic Strategy                            | Advantages                                                                                                                        | Disadvantages                                                                                 |
|-----------------------------------------------|-----------------------------------------------------------------------------------------------------------------------------------|-----------------------------------------------------------------------------------------------|
| <b>Concurrent Template Synthetic Strategy</b> | (1) highly ordered mesostructures and controllable porous structures<br>(2) Universally to synthesize of various components MOMIs | (1) Multi-step synthesis and relatively complex processes<br>(2) Limited templates structures |
| <b>Self-Template Synthetic Strategy</b>       | (1) Simple synthesis steps<br>(2) Expandable to core-shell structures                                                             | (1) Uncontrollable pore structure<br>(2) Limited compositions                                 |
| <b>Dealloying Synthetic Strategy</b>          | (1) Macroscale preparation<br>(2) Simple synthesis steps                                                                          | (1) Limited compositions<br>(2) Sacrificial dealloyed metals                                  |

**Table S2.** Summary of different MOMIs for catalytic applications.

| Synthetic Strategy                     | MOMIs                                                                                                                          | Catalytic applications                             |
|----------------------------------------|--------------------------------------------------------------------------------------------------------------------------------|----------------------------------------------------|
| Concurrent Template Synthetic Strategy | Pt <sub>1</sub> Sn <sub>1</sub> MOMIs;<br>Pt <sub>3</sub> Sn <sub>1</sub> MOMIs                                                | 3-nitrophenylacetylene (3-NPA) semi-hydrogenation  |
| Concurrent Template Synthetic Strategy | High-entropy PtPdFeCoNi MOMIs;<br>Ga <sub>3</sub> Pt <sub>1</sub> MOMIs; Ga <sub>1</sub> Pt <sub>1</sub> MOMIs                 | Electrochemical oxidation reduction reaction (ORR) |
| Concurrent Template Synthetic Strategy | Trimetallic PtZnCo MOMIs<br>(PtZnSc; PtZnV; PtZnCr; PtZnMn; PtZnFe;<br>PtZnNi; PtZnCu; PtZnGa MOMIs)<br>PtP <sub>2</sub> MOMIs | Electrochemical hydrogen evolution reaction (HER)  |
| Concurrent Template Synthetic Strategy | Pd <sub>3</sub> B MOMIs                                                                                                        | p-nitrophenol hydrogenation                        |
| Self-Template Synthetic Strategy       | PdPb MOMIs                                                                                                                     | Electrochemical oxidation reduction reaction (ORR) |
| Self-Template Synthetic Strategy       | AuCu <sub>3</sub> @Au MOMIs                                                                                                    | Electrochemical nitrate reduction reaction         |
| Dealloying Synthetic Strategy          | Co <sub>7</sub> Mo <sub>6</sub> MOMIs                                                                                          | Electrochemical hydrogen evolution reaction (HER)  |
